26 **ABSTRACT**

27 The genus *Caldicellulosiruptor* are extremely thermophilic, heterotrophic anaerobes that  
28 degrade plant biomass using modular, multifunctional enzymes. Prior pangenome analyses  
29 determined that this genus is genetically diverse, with the current pangenome remaining open,  
30 meaning that new genes are expected with each additional genome sequence added. Given the  
31 high biodiversity observed among the genus *Caldicellulosiruptor*, we have sequenced and  
32 added a 14<sup>th</sup> species, *Caldicellulosiruptor changbaiensis*, to the pangenome. The pangenome  
33 now includes 3,791 ortholog clusters, 120 of which are unique to *C. changbaiensis* and may be  
34 involved in plant biomass degradation. Comparisons between *C. changbaiensis* and  
35 *Caldicellulosiruptor bescii* on the basis of growth kinetics, cellulose solubilization and cell  
36 attachment to polysaccharides highlighted physiological differences between the two species  
37 which are supported by their respective gene inventories. Most significantly, these comparisons  
38 indicated that *C. changbaiensis* possesses unique cellulose attachment mechanisms not  
39 observed among the other strongly cellulolytic members of the genus *Caldicellulosiruptor*.

40

## 41 INTRODUCTION

42 The genus *Caldicellulosiruptor* is comprised of extremely thermophilic, fermentative  
43 heterotrophs whose members have been isolated worldwide from terrestrial geothermal springs  
44 or other thermal environments [37]. The original isolates from the genus *Caldicellulosiruptor*  
45 were identified on the basis of their ability to grow on cellulose at elevated temperatures [56,54],  
46 especially temperatures beyond the optimal growth temperature of *Ruminiclostridium*  
47 *thermocellum* [48]. Interest in thermostable enzymes produced by this genus continues, as the  
48 initial discovery of their multifunctional, modular enzymes [51,26,57,67] represented an alternate  
49 paradigm to cellulosomes [2,52]. Further discoveries on the capabilities of these thermostable  
50 enzymes include the unique mode of action used by the central cellulase, CelA, [8], synergistic  
51 activity in ionic liquid optimized enzyme mixtures [45,46] and the creation of designer  
52 cellulosomes from *Caldicellulosiruptor* catalytic domains [29]. Development of a genetics system  
53 for *Caldicellulosiruptor bescii* [14,16] has also expanded the scope of work with this genus,  
54 including metabolic engineering [10,12,13,50] and catalytic improvement [18,30,32,31,34,33].

55 The availability of genome sequences has precipitated deeper insights into the genus  
56 *Caldicellulosiruptor*, including comparative studies which have identified biomarkers for plant  
57 biomass deconstruction [6,5,23], novel insertion elements [15], genetic tractability [11], diverse  
58 mechanisms involved in biomass solubilization [66,37], unique cellulose adhesins (tāpirins)  
59 [5,37] and the identification of new combinations of catalytic domains [5,36,23]. Perhaps owing  
60 to the unique thermal environments that this genus inhabits, their genomes appear to be  
61 dynamic, as the first described *Caldicellulosiruptor* pangenome was predicted to be open [5],  
62 and remained open after the addition of five additional genome sequences [36].

63 Here, we have analyzed the genome sequence of *Caldicellulosiruptor changbaiensis*,  
64 isolated from a hot spring in the Changbai Mountains [3], representing the 14<sup>th</sup> and most recent  
65 addition to the *Caldicellulosiruptor* pangenome. Past *Caldicellulosiruptor* pangenomes were  
66 comprised of multiple species from most countries of origin, which allowed for prior analysis on

67 the basis of biogeography [5], with the exception of China and Japan [20]. Now with the addition  
68 of the *C. changbaiensis* genome sequence, insights into the biogeography of isolates from  
69 China and how they compare to the global *Caldicellulosiruptor* pangenome is possible.  
70 Furthermore, on the basis of the open *Caldicellulosiruptor* pangenome [20,5], we hypothesize  
71 that the *C. changbaiensis* genome may encode for novel substrate-binding proteins and/ or  
72 plant biomass degrading enzymes. In addition to updating the *Caldicellulosiruptor* pangenome,  
73 we also present differences in the growth physiology of *C. changbaiensis* versus  
74 *Caldicellulosiruptor bescii*, currently the benchmark species against which most  
75 *Caldicellulosiruptor* are compared for their plant biomass degrading capabilities.

## 76 MATERIALS AND METHODS

77 **Microbial strains and medium.** Freeze-dried stocks of *C. changbaiensis* strain CBS-Z  
78 were obtained from the Leibniz Institute DSMZ – German Collection of Microorganisms and Cell  
79 Cultures (DSMZ). Glycerol stocks of *C. bescii* DSM-6725 were obtained from the laboratory of  
80 Robert M. Kelly, North Carolina State University (Raleigh, NC). Both species were cultured at  
81 75°C on low osmolarity defined (LOD) medium [25] under a nitrogen headspace to maintain  
82 anaerobic conditions and supplemented with carbohydrates as a carbon source. Carbohydrates  
83 used as a carbon source included cellobiose ( $\geq 99\%$ , Chem-Impex Int'l, Inc.), pectin (Sigma-  
84 Aldrich), xylan (Sigma-Aldrich), glucomannan (NOW Foods), and microcrystalline cellulose (20  
85  $\mu\text{m}$  Sigmacell, Sigma-Aldrich). For genomic DNA isolation, *C. changbaiensis* was cultured  
86 anaerobically at 75°C on low osmolarity complex (LOC) medium [25] with cellobiose as a carbon  
87 source.

88 **Genomic DNA isolation.** Genomic DNA was isolated using the Joint Genome Institute's  
89 CTAB-based protocol ([https://jgi.doe.gov/user-programs/pmo-overview/protocols-sample-  
90 preparation-information/jgi-bacterial-dna-isolation-ctab-protocol-2012/](https://jgi.doe.gov/user-programs/pmo-overview/protocols-sample-preparation-information/jgi-bacterial-dna-isolation-ctab-protocol-2012/)), with modifications. In  
91 order to isolate enough DNA for sequencing, 500 ml of overnight *C. changbaiensis* culture was  
92 harvested by centrifugation at 5000xg, 4°C for 20 minutes and resuspending the cell pellet in  
93 14.8 ml of TE buffer, prior to lysis. Gel electrophoresis in 0.7% agarose was used to assess the  
94 quality of genomic DNA and the concentration and purity of the sample for sequencing was  
95 quantified using a NanoDrop spectrophotometer, and Qubit fluorometric assay (dsDNA HS  
96 assay, Thermo Fisher). Prior to genome sequencing, a 16S rRNA gene fragment was amplified  
97 from isolated genomic DNA using oligonucleotide primers (Eton Bioscience) previously  
98 designed for identification of *C. changbaiensis* [3], for positive identification of *C. changbaiensis*  
99 (**Table 1**). Amplicons were sent for Sanger sequencing (Eton Bioscience), using the same  
100 oligonucleotide primers.

101 **C. changbaiensis genome sequencing, assembly and annotation.** The genome  
102 sequence for *C. changbaiensis* [40] was assembled to 60-fold coverage from long-read Oxford  
103 NanoPore (MinION) data generated in house, and short-read Illumina data generated by  
104 Molecular Research, LP (MR DNA). Hybrid assembly of the complete *C. changbaiensis* genome  
105 used Unicycler v0.4.7 [61], and annotation of the genome used the Prokaryotic Genome  
106 Annotation Pipeline v4.7 [55] provided by the National Center for Biotechnology Information  
107 (NCBI). The assembled genome and reads used for assembly of the *C. changbaiensis* genome  
108 are available through NCBI BioProject accession PRJNA511150.

109 **Phylogenomic analysis.** Fourteen genome sequences from the genus  
110 *Caldicellulosiruptor* were included in the phylogenomic analyses (see **Table 2** for genome  
111 sequence accession numbers). Orthologous protein groups were classified using the  
112 GET\_HOMOLOGUES v20092018 software package [19], running OrthoMCL v1.4 [39],  
113 COGtriangles v2.1 [35], or bidirectional best hits (BDBH) as determined by BLASTP [1,9].  
114 Orthologous protein clusters were determined using the OrthoMCL parameters: 75% pairwise  
115 coverage, maximum BLASTP E-value of 1e-5, and MCL inflation of 1.5. GET\_HOMOLOGUES  
116 was also used to parse the pangenome matrices comparing the *C. changbaiensis* genome  
117 inventory against the recent 13 *Caldicellulosiruptor* pangenome [37] or the revised *C. bescii*  
118 genome [22]. Core- (**Eq. 1**) and pangenome (**Eq. 2**) parameters were predicted after curve  
119 fitting randomly sampled core- or pangenome data to functions previously described by Tettelin  
120 et al., [58].

$$121 \quad \text{coregenes}(g) = 1367 + 1668 \exp\left(\frac{-g}{1.75}\right) \quad (1)$$

$$122 \quad \text{pangenes}(g) = 2371 + 63.2(g - 1) + \exp\left(\frac{-2}{2.19}\right) \frac{1 - \exp\left(\frac{-(g-1)}{2.19}\right)}{1 - \exp\left(\frac{-1}{2.19}\right)} \quad (2)$$

123 Genome-level similarity was quantified as average nucleotide identity (ANIb) from the BLASTN+  
124 alignment of 1,020 nt fragments from the 14 *Caldicellulosiruptor* genomes [49,27]. ANIb were

125 calculated by Pyani v.0.2.7, (<https://github.com/widdowquinn/pyani>) and percent identities were  
126 plotted as a heatmap by the software package.

127 **Growth kinetics on polysaccharides.** *C. bescii* or *C. changbaiensis* were revived from  
128 -80°C glycerol stocks for growth curve analysis on microcrystalline cellulose, xylan, pectin or  
129 glucomannan. Glycerol stocks (1 ml) were subcultured into 50 ml LOD medium for 3  
130 consecutive subcultures using 2% (v/v) inoculum at each passage. Revived cultures were then  
131 transferred (2% [v/v] inoculum) to LOD medium containing a 1:1 ratio of maltose (*C. bescii*) or  
132 cellobiose (*C. changbaiensis*) to polysaccharide. The 1:1 mixture was then passaged (2% [v/v]  
133 inoculum) three times successively in LOD medium with polysaccharide, only. Cultures for  
134 growth curves were inoculated at a starting cell density of  $1 \times 10^6$  cells ml<sup>-1</sup> in 200 ml LOD plus  
135 the respective polysaccharide. Biological replicates were used for each growth phase  
136 experiment. Cell counting used epifluorescence microscopy at 1000x total magnification and a  
137 counting reticle as described previously [28]. Cells were fixed in a final volume of 1.1 ml  
138 glutaraldehyde (2.5% [v/v] in water) prior to incubation with acridine orange (1 g l<sup>-1</sup>) and  
139 approximately 5 ml sterilized water and thoroughly mixed. Stained cells were then vacuum  
140 filtered through a polycarbonate 0.22 µm filter (GE). Samples were counted using a 10x10  
141 reticle a total of ten times. Cell counts were averaged for calculation of cell density (cells ml<sup>-1</sup>).  
142 Doubling times are described as the number of hours per generation during exponential growth,  
143 calculated as  $\Delta$ time divided by the number of generations.

144 **Microcrystalline cellulose solubilization.** Solubilization of microcrystalline cellulose  
145 followed protocols established by Zurawski *et al.*, [66] with modifications. *C. bescii* or *C.*  
146 *changbaiensis* were cultured in serum bottles with 50 ml of LOD medium supplemented with  
147 0.6g of microcrystalline cellulose (20µm Sigmacell) at a starting cell density of  $10^6$  cells ml<sup>-1</sup>.  
148 Cultures were then incubated without shaking at 75°C for seven days, after which the remaining  
149 microcrystalline cellulose was harvested by centrifugation at 6000 xg, 4°C for 15 min in a swing  
150 bucket rotor. The cellulose pellet was washed four times in sterile, deionized water and air dried

151 at 75°C until the weight of the microcrystalline cellulose did not change. Uninoculated LOD  
152 served as an abiotic control. Percent solubilization is reported as the difference in substrate  
153 weight divided by the starting weight multiplied by 100. All experimental conditions were  
154 measured in triplicate and significance was determined by a t-test (p-value < 0.05).

155 **Cell attachment assays.** *C. bescii* and *C. changbaiensis* cell cultures were grown to  
156 early stationary phase on either xylan or cellulose (1 g l<sup>-1</sup>) as the carbon source, and cell  
157 densities were calculated before harvesting at 5000 xg for 10 minutes at room temperature.  
158 Cells were resuspended and concentrated ten-fold in the binding buffer (50 mM sodium  
159 phosphate, pH 7.2) to a 10-fold density of approximately 1-2 x 10<sup>9</sup> cells ml<sup>-1</sup> for cells cultured on  
160 xylan or 1 x 10<sup>8</sup> cells ml<sup>-1</sup> for cells cultured on cellulose. For each treatment condition, 1.2 ml of  
161 *C. bescii* or *C. changbaiensis* planktonic cells in binding buffer were added to a 1.5 ml  
162 microcentrifuge tube, and supplemented with 10 mg of washed substrate (experimental  
163 condition: xylan or cellulose), or no substrate for the negative control. All assay tubes were  
164 incubated at room temperature for one hour with gentle rotary shaking at 100 rpm. After  
165 incubation, planktonic cells were enumerated as described above for the growth curves. Each  
166 binding assay was repeated six times. Two-sample t-tests were used to analyze the data using  
167 the R studio statistics package v.3.3.3 [47].

168



## 169 RESULTS AND DISCUSSION

170 **Phylogenomic analysis of the *C. changbaiensis* genome.** With the addition of the  
171 fourteenth *Caldicellulosiruptor* genome [40], we sought to define an updated core- and  
172 pangenome. Three different algorithms: OrthoMCL [39], bidirectional best hit and COGtriangles  
173 [35] were used to classify orthologous clusters for pangenome analysis (**Table S1**). Of the three,  
174 the clusters formed by OrthoMCL resulted in an estimated core- and pangenome with the lowest  
175 residual standard errors, and are reported here (**Fig. 1**). Overall, there are 120 unique protein  
176 clusters identified in the *C. changbaiensis* genome when compared to the prior  
177 *Caldicellulosiruptor* pangenome [37], 75 of which were annotated as hypothetical proteins.  
178 Further transcriptomic and proteomic studies may aid in the identification of the function of these  
179 unique hypothetical proteins. By adding a 14<sup>th</sup> genome, the *Caldicellulosiruptor* core genome  
180 was reduced to 1,367 orthologous clusters (see **Eq. 1**), however, the pangenome (3,791 genes)  
181 continues to expand at an estimated rate of 63.2 genes per additional genome (**Eq. 2, Fig. 1**)  
182 highlighting the plasticity of the *Caldicellulosiruptor* pangenome.

183 In contrast to previously released genome sequences from New Zealand [36], *C.*  
184 *changbaiensis* exhibits a similar pattern of biogeography based on average nucleotide identity  
185 (ANIb). As expected, *Caldicellulosiruptor* sp. F32, isolated from compost in China [63], and *C.*  
186 *naganoensis*, isolated from a hot spring in Japan [56] shared higher percent identity levels with  
187 *C. changbaiensis*, along with *C. saccharolyticus*, isolated from a hot spring in New Zealand (**Fig.**  
188 **2, Table S2**). All species that *C. changbaiensis* shared the highest ANI with have been  
189 described and confirmed as being strongly cellulolytic, implying that the *C. changbaiensis*  
190 genome would also encode for a glucan degradation locus (GDL). Despite the high level of  
191 ANIb, based on the open *Caldicellulosiruptor* pangenome, we expected to find new genes  
192 involved in carbohydrate metabolism and possibly GDL arrangements.

193 ***C. changbaiensis* exhibits different abilities to grow on polysaccharides versus *C.***  
194 ***bescii*.** In order to benchmark the ability of *C. changbaiensis* to grow on plant-related

195 polysaccharides, we compared its doubling time during exponential growth on representative  
196 plant polysaccharides to *C. bescii* (**Table 3**). Doubling times (generation time) were calculated  
197 from cell densities measured during exponential growth. Overall, *C. changbaiensis* grows slower  
198 on microcrystalline cellulose than *C. bescii*, with a 38% larger doubling time during growth on  
199 crystalline cellulose, however, both cultures grew at similar rates on xylan. On both  
200 glucomannan, and pectin, *C. changbaiensis* grew faster with 35% lower doubling times (**Table**  
201 **3**). The differential ability of *C. changbaiensis* and *C. bescii* to grow on pectin and glucomannan  
202 is not unexpected, as the differential ability from one species to another to hydrolyze and  
203 metabolize plant biomass, comprised of polysaccharides such as xylan, pectin and  
204 glucomannan, was previously observed, in one case *C. saccharolyticus* grew slower on plant  
205 biomass versus *C. bescii* [62] and *C. kronotskyensis* [66] and another observation where *C.*  
206 *danielii* grew approximately 50% faster than *C. bescii*, *C. morganii* and *C. naganoensis* on plant  
207 biomass [36].

208         When comparing the genomes of *C. changbaiensis* and *C. bescii*, *C. changbaiensis*  
209 encodes for 411 genes not shared with *C. bescii*, 120 of which are unique to the genus. We  
210 expect that the differences in growth rates on carbohydrates to be related to differences in gene  
211 inventory. In fact, the *C. changbaiensis* gene inventory encoding for carbohydrate active  
212 enzymes includes 13 genes not found in the *C. bescii* genome, including an annotated  $\beta$ -  
213 mannanase (glycoside hydrolase [GH] family 26) and two mannooligosaccharide  
214 phosphorylases (GH130). This additional  $\beta$ -mannanase and phosphorylases likely contribute to  
215 the enhanced growth of *C. changbaiensis* on glucomannan (**Table 3**).

216         The lower doubling time on pectin is surprising, however, given that *C. changbaiensis*  
217 does not encode for the pectinase cluster that is located in the *C. bescii* genome immediately  
218 downstream of the GDL. *C. bescii* gene deletion strains lacking the pectinase cluster were  
219 impaired in their growth on both pectin-rich plant biomass and pectin [17], indicating that *C.*  
220 *changbaiensis* has evolved alternate mechanisms to deconstruct or metabolize pectin.

221 Screening the *C. changbaiensis* genome for pectin-related enzymes did not identify any genes  
222 encoding for polysaccharide lyases (PL) that were unique in comparison to *C. bescii*, however  
223 genes encoding for representatives from GH family 43, 51 ( $\alpha$ -L-arabinofuranosidases) and 95 ( $\alpha$   
224 -fucosidase) were present. One scenario is that these enzymes participate in the hydrolysis of  
225 carbohydrate sidechains from pectin [44]. Another plausible explanation is that *C.*  
226 *changbaiensis* has evolved to import and efficiently ferment a broader range of carbohydrates  
227 released during growth on plant biomass, including uronic acids, and/ or the deoxy sugars  
228 fucose and rhamnose. While *C. bescii* may rely on its enzymatic repertoire to deconstruct plant  
229 biomass, it may not metabolize all types of carbohydrates that are released, similar to *R.*  
230 *thermocellum* which produces xylanases, but does not metabolize xylose [42,43].

231 **Organization of the *C. changbaiensis* genome degradation locus.** *C. changbaiensis*  
232 was originally described as strongly cellulolytic [3] and accordingly, its genome encodes for a  
233 GDL that shares a similar organization with other strongly cellulolytic members of the genus.  
234 since *C. bescii* was able to grow at a faster rate on microcrystalline cellulose than *C.*  
235 *changbaiensis* (**Table 3**), we opted to focus on the comparison of GDL between these two  
236 species. The GDL from both species is remarkably similar, with only CelD possessing a different  
237 arrangement of catalytic and non-catalytic domains (GH10-CBM3-GH5) from *C. changbaiensis*,  
238 and truncated versions of CelE (GH9-CBM3-GH5) and CelF (GH74-CBM3) present (**Fig. 3**).  
239 Prior *in vitro* biochemical analyses on the synergy of cellulase mixtures from *C. bescii* had  
240 observed that a mixture of three cellulases, CelA, CelC and CelE (ACE cellulases) worked  
241 synergistically to hydrolyze cellulose as well as a mixture of all six *C. bescii* cellulases [21]. One  
242 could hypothesize, then, that members of the genus *Caldicellulosiruptor* that possess all three of  
243 these enzymes would be among the most cellulolytic. Three additional species, *C.*  
244 *kronotskyensis*, *C. danielii*, and *C. naganoensis* also share a similar organization of their GDL  
245 [36], including the presence of CelA, CelC and CelE. The contributions of CelD and CelF to

246 cellulose hydrolysis or solubilization are low [22,21] and likely not to impact the ability of *C.*  
247 *changbaiensis* to efficiently hydrolyze cellulose.

248 Indeed, *C. changbaiensis* can solubilize microcrystalline cellulose (**Fig. 4**), however the  
249 amount of cellulose solubilized was 22.4% lower than the amount solubilized by *C. bescii*, which  
250 is similar to the performance of *C. saccharolyticus* when compared to *C. bescii* [24.8% lower,  
251 66]. This result begs the question if the mere presence of the ACE cellulases is sufficient to  
252 meet the *C. bescii* benchmark for hydrolysis of cellulose. One explanation could be that the *C.*  
253 *changbaiensis* CelE ortholog may not be as efficient in cellulose hydrolysis since it is lacking  
254 two CBM3 modules. However, the nearly equal reduction of cellulose solubilization by both *C.*  
255 *bescii* gene deletion strains incapable of producing CelA-CelC versus CelA-CelE does not  
256 support this possibility [22]. Furthermore, CelE truncations that possessed the GH9 catalytic  
257 domain and three or two CBM3 domains were equally capable of microcrystalline cellulose  
258 hydrolysis [53], making it unlikely that the loss of a CBM3 domain from the *C. changbaiensis*  
259 CelA ortholog hampered its activity.

260 Alternately, sequence divergence of ACE cellulase orthologs may play a larger role in  
261 the catalytic capacity of cellulolytic members from the genus *Caldicellulosiruptor*. Of the ACE  
262 cellulases, CelA is a key player, supported by its unique hydrolysis mechanism [8], the severe  
263 reduction in cellulose hydrolysis by *C. bescii* celA gene deletion mutant [65,22], and biochemical  
264 analysis of GDL enzyme synergy [21]. Prior comparison of CelA orthologs from *C. bescii* and *C.*  
265 *danielii* found *CbCelA* to be a superior enzyme [36], indicating that GDL sequences have  
266 diverged during speciation, making it likely that the ACE cellulases from *C. changbaiensis* may  
267 not demonstrate the same catalytic efficiency as *C. bescii*.

268 **Attachment of *C. bescii* and *C. changbaiensis* to plant polysaccharides.** Aside from  
269 comparisons of catalytic ability, we also compared the ability of *C. changbaiensis* versus *C.*  
270 *bescii* planktonic cells to bind to insoluble substrates (xylan and cellulose). A decrease in the  
271 planktonic cell density (PCD) after exposure to the substrate compared to the PCD of the

272 negative controls without substrate is indicative of cells binding to the substrate. Surprisingly, we  
273 saw no such decrease in PCD for *C. changbaiensis* cultured on xylan after incubation with  
274 cellulose or xylan (**Figs. 5A and B**). This inability of *C. changbaiensis* to attach to xylan or  
275 cellulose after growth on xylan is surprising, given that xylan is a major polysaccharide  
276 constituent of lignocellulose, and would likely serve as a chemical signal. Since no xylan or  
277 cellulose attachment proteins are produced in response to growth on xylan, *C. changbaiensis*  
278 appears to act as a specialist, responding only to cellulose. Regardless, when *C. changbaiensis*  
279 is grown on cellulose, it maintains an ability to attach to cellulose (29% cells attached), which is  
280 slightly lower than the relative amount of *C. bescii* cells attached to cellulose (33% attached,  
281 **Fig. 5C**). Surprisingly, when *C. bescii* cells cultured on xylan were tested for attachment to  
282 either xylan or cellulose there was a significant decrease in (PCD) of indicating that *C. bescii*  
283 cells grown on xylan are producing proteins capable of attaching to xylan (33% attachment, **Fig.**  
284 **5A**) or cellulose (68% attachment, **Fig. 5B**). While we expected to see cells from cultures grown  
285 on xylan attaching to xylan, interestingly, *C. bescii* cell attachment was most pronounced when  
286 cells were grown on xylan and incubated with cellulose (**Fig. 5B**). The ability of *C. bescii* to  
287 attach to cellulose (**Figs. 5B and C**), is in large part due to the presence of tāpirins, since a *C.*  
288 *bescii* tāpirin deletion mutant was severely impaired in cellular attachment to cellulose [37].

289 **The *C. changbaiensis* genome encodes for atypical tāpirin genes.** Another notable  
290 difference observed between *C. changbaiensis* and *C. bescii* during growth on cellulose is the  
291 lack of floc formation by *C. changbaiensis* (**Fig. 6**). Based on this discrepancy between *C.*  
292 *changbaiensis* and *C. bescii*, we examined the genomic context of the type IV pilus locus  
293 encoded by the *C. changbaiensis* genome (**Fig. 7**). The T4P locus is found in the genome in all  
294 members of the *Caldicellulosiruptor*, and is also located upstream of the GDL in the genomes of  
295 strongly cellulolytic species [5,4]. Most notably, while a full T4P locus is present in the *C.*  
296 *changbaiensis* genome, classical tāpirin genes are absent which encode for proteins that bind  
297 with high affinity to cellulose [4,37]. Instead, two genes with little, to no homology to the classical

298 tāpirins are located directly downstream of the T4P locus which we will refer to as atypical  
299 tāpirins. The proteins encoded for by these genes are not unique to *C. changbaiensis*, as both  
300 *C. acetigenus* and *C. ownesensis* also encode for these atypical tāpirins. All three species  
301 encode for two atypical tāpirins: a hypothetical protein (Genbank accession: WP\_127352232.1)  
302 and a von Willebrand Factor A protein (Genbank accession: WP\_127352233.1) (yellow arrows,  
303 **Fig. 7**). While *C. changbaiensis* shares a similar genomic context at the 3' end of the T4P locus,  
304 the atypical *C. changbaiensis* tāpirins are not close orthologs, as they share 74.33% and  
305 68.01% amino sequence similarity with the first and second atypical tāpirins encoded *C.*  
306 *ownesensis*. Prior proteomics data collected from cellulose-bound, supernatant and whole cell  
307 lysate protein fractions determined that both atypical tāpirins are produced by *C. ownesensis* in  
308 response to cellulose [5], supporting their potential role in cell attachment to cellulose.

309         This observed sequence divergence between the atypical tāpirins from strongly and  
310 weakly cellulolytic species is similar to the tāpirin encoded for by *C. hydrothermalis* which  
311 shares little amino acid sequence homology with classical tāpirins, but shares a similar tertiary  
312 structure, and is capable of occupying more sites on crystalline cellulose in comparison to  
313 classical tāpirins [37]. Production of tāpirins with an affinity to cellulose likely plays a role in the  
314 ability of weakly cellulolytic members of the genus to adhere to cellulose and benefit from the  
315 celooligosaccharides released by the action of cellulases [60]. The atypical tāpirins, originally  
316 only observed in the genomes of weakly cellulolytic species, may also serve as cellulose  
317 adhesins, however, further in-depth biochemical characterization of both atypical tāpirin proteins  
318 is required to confirm their function.

## 319 CONCLUSIONS

320 Overall, the *Caldicellulosiruptor* pangenome remains open, and is expected to gain  
321 approximately 63 new genes with each additional species sequenced (**Fig. 1A**). The addition of  
322 a second species isolated from China indicates that the diversity of *Caldicellulosiruptor* species  
323 from this region is higher than those isolated from Iceland, however, the level of observed  
324 diversity is not as high as those species isolated from Kamchatka, Russia or New Zealand on  
325 the basis of ANIb (**Fig. 2**). *C. changbaiensis* encodes for a GDL (**Fig. 3**) similar in organization  
326 as *C. bescii*, however is not as cellulolytic as *C. bescii* on the basis of doubling time (**Table 3**)  
327 and cellulose solubilization (**Fig. 4**). However, *C. changbaiensis* does appear to have a broader  
328 metabolic appetite for uronic acids or deoxy sugars. *C. changbaiensis* also fails to form a floc  
329 during growth on microcrystalline cellulose (**Fig. 6**), a phenotype previously described for *C.*  
330 *bescii* [64], however both species are capable of attaching to cellulose (**Fig. 5**). Interestingly, *C.*  
331 *bescii* retains an ability to attach to cellulose when previously grown on xylan, while *C.*  
332 *changbaiensis* does not (**Fig. 5B**) indicating that the two species respond differently to soluble  
333 carbohydrates present in their environment. Tāpirins were previously demonstrated to be key  
334 cellulose adhesins for strongly [4] to weakly cellulolytic [37] members of the genus  
335 *Caldicellulosiruptor*. Surprisingly, *C. changbaiensis* does not encode for the classical tāpirins,  
336 and instead encodes for atypical tāpirins, one of which possesses a von Willebrand type A  
337 protein domain (**Fig. 7**). These atypical tāpirins are homologous to those encoded for by weakly  
338 cellulolytic *C. owensensis* and *C. acetigenus*, however this may not indicate that the atypical  
339 tāpirins are not involved in attachment to cellulose, as the divergent classical tāpirin encoded for  
340 by *C. hydrothermalis* binds at a high density to cellulose [37]. The combined lack of classical  
341 tāpirins, along with the ability to attach to cellulose indicates that *C. changbaiensis* evolved a  
342 unique strategy to attach to cellulose. Further study on the biophysical properties of these  
343 atypical tāpirins is warranted to assess their ability to interact with plant polysaccharides,  
344 including cellulose.



345 **FIGURE LEGENDS**

346 **Figure 1. Core- and pangenome size estimates calculated from random sampling of 14**

347 ***Caldicellulosiruptor* genomes. (a)** Fitted curve of the estimated *Caldicellulosiruptor* core

348 genome from 10 random samples of genomes up to n=14. The current size of the core genome

349 is 1367 orthologous clusters. **(b)** Fitted curve of the estimated *Caldicellulosiruptor* pangenome

350 from 10 random samples of genomes up to n=14. The *Caldicellulosiruptor* pangenome remains

351 open and has increased to 3791 genes. The rate of growth for the pangenome is 63.2 new

352 genes per genome sequenced. Core- and pangenome estimates were calculated from the

353 equations reported by Tettelin *et al.*, [58] using GET\_HOMOLOGUES software [19].

354

355 **Figure 2. Heatmap representation of the average nucleotide identity for 14 genome**

356 **sequenced species from the genus *Caldicellulosiruptor*.** Average nucleotide identity (ANIb)

357 was calculated on the basis of legacy BLASTn sequence identity over 1020nt sequence

358 fragments. ANIb values of all 14 genomes are represented by a heat plot ranging from blue

359 (75% < ANIb < 90%), white (90% < ANIb < 95%) to red (ANIb > 95%). Pyani

360 (<https://github.com/widdowquinn/pyani>) was used to calculate ANIb values and generate the

361 clustered heatmap. Hierarchical cluster dendrograms were generated on the basis of similar ANIb

362 values across each species. ANIb values are reported in Table S1. Calace, *C. acetigenus*;

363 Cbes, *C. bescii*; Calcha, *C. changbaiensis*; Caldan, *C. danielii*; Calhy, *C. hydrothermalis*; Calkr,

364 *C. kristjanssonii*; Calkro, *C. kronotskyensis*; Calla, *C. lactoaceticus*; Calmo, *C. morganii*; Calna,

365 *C. naganoensis*; COB47, *C. obsidiansis*; Calow, *C. owensensis*; Csac, *C. saccharolyticus*; F32,

366 *C. sp. F32*.

367

368 **Figure 3. Modular multifunctional enzymes encoded for by the glucan degradation locus.**

369 Glucan degradation loci were selected on the basis of the presence of “ACE” cellulases. ACE

370 cellulases: CelA, CelC and CelE. Circles represent the glycoside hydrolase (GH) domains,



371 rectangles represent the carbohydrate binding module (CBM) domains. GH5, green circles;  
372 GH9, red circles; GH10, violet circles; GH 44, blue circles; GH48, grey circles; GH74, orange  
373 circles. CBM3, grey rectangles; CBM22, pink rectangles.

374

375 **Figure 4. Solubilization of microcrystalline cellulose by *C. bescii* and *C. changbaiensis*.**

376 Uninoculated control, indicates abiotic cellulose solubilization in LOD medium. Error bars  
377 represent standard error (n=3). Similar letters over columns denote  $p < 0.05$  as determined by a  
378 t-test.

379

380 **Figure 5. Comparison of the ability of *C. bescii* or *C. changbaiensis* planktonic cells to**

381 **attach to polysaccharides.** Titles above bar charts indicate the carbon source for growth/  
382 binding substrate. **(a, b)** When cells are grown on xylan, only planktonic *C. bescii* cells were

383 able to attach to xylan or cellulose. **(c)** Cells grown on cellulose as the carbon source and

384 exposed to cellulose as the binding substrate. Planktonic cell densities (PCD), enumerated by  
385 epifluorescence microscopy are plotted on the y-axis. Green columns indicate PCD without

386 binding substrate and purple columns indicate PCD with the binding substrate. \* indicates  $p <$   
387 0.01 as determined by a t-test. All assays had n=6 biological replicates.

388

389

389 **Figure 6. Flocculation of *C. bescii* cells cultured on chemically defined medium and**

390 **microcrystalline cellulose. (a)** Formation of a floc of *C. bescii* cells around microcrystalline

391 cellulose (diameter, 20 $\mu$ m) while planktonic *C. changbaiensis* cells (cloudiness) are visible. **(b)**

392 Same serum bottles as in "A", however the bottles were vigorously mixed. The *C. bescii* floc

393 remains fairly stable, while both microcrystalline cellulose and cells are mixed in the *C.*

394 *changbaiensis* culture.

395

396 **Figure 7. Genomic context for the location of the tāpirins from strongly to weakly**  
397 **cellulolytic *Caldicellulosiruptor* species.** Different colors represent the classical versus  
398 atypical tāpirins. Blue arrows: Cbes tāpirin 1 (Gen bank accession: YP\_002573732) and Cbes  
399 tāpirin 2 (Gen bank accession: YP\_002573731). Green arrow: Calhy tāpirin 1 (Gen bank  
400 accession number: YP\_003992006). Yellow arrows: Calcha tāpirin 1 (Gen bank accession:  
401 WP\_127352232.1) and 2 (Gen bank accession: WP\_127352233.1), and Calow tāpirin 1 (Gen  
402 bank accession: YP\_004002936) and 2 (Gen bank accession r: YP\_004002935). Grey  
403 rectangles indicate the presence of the GDL downstream of the tāpirins. Atypical tāpirin 1 is  
404 annotated as a hypothetical protein and atypical tāpirin 2 is annotated as a von Willebrand  
405 factor A protein. Cbes, *C. bescii*; Calhy, *C. hydrothermalis*; Calcha, *C. changbaiensis* and  
406 Calow, *C. owensensis*. Peach rectangles represent the type IV pilus locus directly upstream of  
407 the tāpirins. Arrows indicate tāpirin 1 and 2. Numbers in the tāpirin arrows indicate the amino  
408 acid length.

409 **Conflict of Interest:** A.M.A.M., C.M., V.J.H. and S.E.B.-S. declare that they have no conflict of  
410 interest.

411

| <b>Table 1. Oligonucleotide primers used for</b>                        |                                   |               | 412 |
|-------------------------------------------------------------------------|-----------------------------------|---------------|-----|
| <b><i>Caldicellulosiruptor</i> 16S rRNA gene fragment amplification</b> |                                   |               |     |
| <b>Primer Name</b>                                                      | <b>Primer Sequence (5' to 3')</b> | <b>Source</b> |     |
| 8F-207                                                                  | AGAGTTTGATCCTGGCTCAG              | [3]           |     |
| Caldi-R-208                                                             | GTACGGCTACCTTGTTACG               |               |     |

| <b>Species Name</b>       | <b>NCBI RefSeq Accession</b> | <b>Reference</b> |
|---------------------------|------------------------------|------------------|
| <i>C. acetigenus</i>      | GCF_000421725.1              | [41]             |
| <i>C. bescii</i>          | GCF_000022325.1              | [22]             |
| <i>C. changbaiensis</i>   | GCF_003999255.1              | [40]             |
| <i>C. danielii</i>        | GCF_000955725.1              | [38,36]          |
| <i>C. hydrothermalis</i>  | GCF_000166355.1              | [7,5]            |
| <i>C. kristjanssonii</i>  | GCF_000166695.1              | [7,5]            |
| <i>C. kronotskyensis</i>  | GCF_000166775.1              | [7,5]            |
| <i>C. lactoaceticus</i>   | GCF_000193435.2              | [7,5]            |
| <i>C. morganii</i>        | GCF_000955745.1              | [38,36]          |
| <i>C. naganoensis</i>     | GCF_000955735.1              | [38,36]          |
| <i>C. obsidiensis</i>     | GCF_000145215.1              | [24]             |
| <i>C. owensensis</i>      | GCF_000166335.1              | [7,5]            |
| <i>C. saccharolyticus</i> | GCF_000016545.1              | [59]             |
| <i>C. str. F32</i>        | GCF_000404025.1              | [63]             |

413

414

| <b>Table 3. Doubling time of <i>C. changbaiensis</i> or <i>C. bescii</i><br/>grown on plant polysaccharides</b> |                                   |                                     |
|-----------------------------------------------------------------------------------------------------------------|-----------------------------------|-------------------------------------|
| <b>Polysaccharide</b>                                                                                           | <b><math>g_{Cbes}</math> (hr)</b> | <b><math>g_{Calcha}</math> (hr)</b> |
| Microcrystalline cellulose                                                                                      | $3.93 \pm 0.157$                  | $5.43 \pm 0.304$                    |
| Beechwood xylan                                                                                                 | $2.55 \pm 0.211$                  | $2.54 \pm 0.428$                    |
| Glucomannan                                                                                                     | $3.22 \pm 0.62$                   | $2.08 \pm 0.025$                    |
| Pectin                                                                                                          | $3.48 \pm 0.224$                  | $2.26 \pm 0.167$                    |

## References

- 415  
416  
417 1. Altschul SF, Madden TL, Schaffer AA, Zhang J, Zhang Z, Miller W, Lipman DJ (1997)  
418 Gapped BLAST and PSI-BLAST: a new generation of protein database search  
419 programs. *Nucleic Acids Res* 25:3389-3402
- 420 2. Artzi L, Bayer EA, Morais S (2017) Cellulosomes: bacterial nanomachines for dismantling  
421 plant polysaccharides. *Nat Rev Microbiol* 15:83-95. doi:10.1038/nrmicro.2016.164
- 422 3. Bing W, Wang H, Zheng B, Zhang F, Zhu G, Feng Y, Zhang Z (2015) *Caldicellulosiruptor*  
423 *changbaiensis* sp. nov., a cellulolytic and hydrogen-producing bacterium from a hot  
424 spring. *Int J Syst Evol Microbiol* 65:293-297. doi:10.1099/ijms.0.065441-0
- 425 4. Blumer-Schuette SE, Alahuhta M, Conway JM, Lee LL, Zurawski JV, Giannone RJ, Hettich  
426 RL, Lunin VV, Himmel ME, Kelly RM (2015) Discrete and structurally unique proteins  
427 (täpirins) mediate attachment of extremely thermophilic *Caldicellulosiruptor* species to  
428 cellulose. *J Biol Chem* 290:10645-10656. doi:10.1074/jbc.M115.641480
- 429 5. Blumer-Schuette SE, Giannone RJ, Zurawski JV, Ozdemir I, Ma Q, Yin Y, Xu Y, Kataeva I,  
430 Poole FL, 2nd, Adams MW, Hamilton-Brehm SD, Elkins JG, Larimer FW, Land ML,  
431 Hauser LJ, Cottingham RW, Hettich RL, Kelly RM (2012) *Caldicellulosiruptor* core and  
432 pangenomes reveal determinants for noncellulosomal thermophilic deconstruction of  
433 plant biomass. *J Bacteriol* 194:4015-4028. doi:10.1128/JB.00266-12
- 434 6. Blumer-Schuette SE, Lewis DL, Kelly RM (2010) Phylogenetic, microbiological, and glycoside  
435 hydrolase diversities within the extremely thermophilic, plant biomass-degrading genus  
436 *Caldicellulosiruptor*. *Appl Environ Microbiol* 76:8084-8092. doi:10.1128/AEM.01400-10
- 437 7. Blumer-Schuette SE, Ozdemir I, Mistry D, Lucas S, Lapidus A, Cheng JF, Goodwin LA,  
438 Pitluck S, Land ML, Hauser LJ, Woyke T, Mikhailova N, Pati A, Kyrpides NC, Ivanova N,  
439 Detter JC, Walston-Davenport K, Han S, Adams MW, Kelly RM (2011) Complete  
440 genome sequences for the anaerobic, extremely thermophilic plant biomass-degrading  
441 bacteria *Caldicellulosiruptor hydrothermalis*, *Caldicellulosiruptor kristjanssonii*,

- 442 *Caldicellulosiruptor kronotskyensis*, *Caldicellulosiruptor owensensis*, and  
443 *Caldicellulosiruptor lactoaceticus*. J Bacteriol 193:1483-1484. doi:10.1128/JB.01515-10
- 444 8. Brunecky R, Alahuhta M, Xu Q, Donohoe BS, Crowley MF, Kataeva IA, Yang SJ, Resch MG,  
445 Adams MW, Lunin VV, Himmel ME, Bomble YJ (2013) Revealing nature's cellulase  
446 diversity: the digestion mechanism of *Caldicellulosiruptor bescii* CelA. Science  
447 342:1513-1516. doi:10.1126/science.1244273
- 448 9. Camacho C, Coulouris G, Avagyan V, Ma N, Papadopoulos J, Bealer K, Madden TL (2009)  
449 BLAST+: architecture and applications. BMC Bioinformatics 10:421. doi:10.1186/1471-  
450 2105-10-421
- 451 10. Cha M, Chung D, Elkins JG, Guss AM, Westpheling J (2013) Metabolic engineering of  
452 *Caldicellulosiruptor bescii* yields increased hydrogen production from lignocellulosic  
453 biomass. Biotechnol Biofuel 6:1-8. doi:10.1186/1754-6834-6-85
- 454 11. Chung D, Cha M, Farkas J, Westpheling J (2013) Construction of a stable replicating shuttle  
455 vector for *Caldicellulosiruptor* species: Use for extending genetic methodologies to other  
456 members of this genus. PLoS One 8:e62881. doi:10.1371/journal.pone.0062881
- 457 12. Chung D, Cha M, Guss AM, Westpheling J (2014) Direct conversion of plant biomass to  
458 ethanol by engineered *Caldicellulosiruptor bescii*. Proceedings of the National Academy  
459 of Sciences:201402210. doi:10.1073/pnas.1402210111
- 460 13. Chung D, Cha M, Snyder EN, Elkins JG, Guss AM, Westpheling J (2015) Cellulosic ethanol  
461 production via consolidated bioprocessing at 75 °C by engineered *Caldicellulosiruptor*  
462 *bescii*. Biotechnol Biofuel 8:163. doi:10.1186/s13068-015-0346-4
- 463 14. Chung D, Farkas J, Huddleston JR, Olivar E, Westpheling J (2012) Methylation by a unique  
464  $\alpha$ -class N4-cytosine methyltransferase Is required for DNA transformation of  
465 *Caldicellulosiruptor bescii* DSM6725. PLoS One 7:e43844.  
466 doi:10.1371/journal.pone.0043844



- 467 15. Chung D, Farkas J, Westpheling J (2013) Detection of a novel active transposable element  
468 in *Caldicellulosiruptor hydrothermalis* and a new search for elements in this genus. J Ind  
469 Microbiol Biotechnol 40:517-521. doi:10.1007/s10295-013-1244-z
- 470 16. Chung D, Farkas J, Westpheling J (2013) Overcoming restriction as a barrier to DNA  
471 transformation in *Caldicellulosiruptor* species results in efficient marker replacement.  
472 Biotechnol Biofuel 6:1-9. doi:10.1186/1754-6834-6-82
- 473 17. Chung D, Pattathil S, Biswal AK, Hahn MG, Mohnen D, Westpheling J (2014) Deletion of a  
474 gene cluster encoding pectin degrading enzymes in *Caldicellulosiruptor bescii* reveals an  
475 important role for pectin in plant biomass recalcitrance. Biotechnol Biofuel 7:147.  
476 doi:10.1186/s13068-014-0147-1
- 477 18. Chung D, Young J, Cha M, Brunecky R, Bomble YJ, Himmel ME, Westpheling J (2015)  
478 Expression of the *Acidothermus cellulolyticus* E1 endoglucanase in *Caldicellulosiruptor*  
479 *bescii* enhances its ability to deconstruct crystalline cellulose. Biotechnol Biofuel 8:113.  
480 doi:10.1186/s13068-015-0296-x
- 481 19. Contreras-Moreira B, Vinuesa P (2013) GET\_HOMOLOGUES, a versatile software package  
482 for scalable and robust microbial pangenome analysis. Appl Environ Microbiol 79:7696-  
483 7701. doi:10.1128/AEM.02411-13
- 484 20. Conway JM, Crosby JR, Hren AP, Southerland RT, Lee LL, Lunin VV, Alahuhta P, Himmel  
485 ME, Bomble YJ, Adams MWW, Kelly RM (2018) Novel multidomain, multifunctional  
486 glycoside hydrolases from highly lignocellulolytic *Caldicellulosiruptor* species. AIChE J  
487 64:4218-4228. doi:10.1002/aic.16354
- 488 21. Conway JM, Crosby JR, McKinley BS, Seals NL, Adams MWW, Kelly RM (2018) Parsing in  
489 vivo and in vitro contributions to microcrystalline cellulose hydrolysis by multidomain  
490 glycoside hydrolases in the *Caldicellulosiruptor bescii* secretome. Biotechnol Bioeng 0.  
491 doi:10.1002/bit.26773

- 492 22. Conway JM, McKinley BS, Seals NL, Hernandez D, Khatibi PA, Poudel S, Giannone RJ,  
493 Hettich RL, Williams-Rhaesa AM, Lipscomb GL, Adams MWW, Kelly RM (2017)  
494 Functional analysis of the glucan degradation locus in *Caldicellulosiruptor bescii* reveals  
495 essential roles of component glycoside hydrolases in plant biomass deconstruction. Appl  
496 Environ Microbiol 83:e01828-01817. doi:10.1128/AEM.01828-17
- 497 23. Dam P, Kataeva I, Yang S-J, Zhou F, Yin Y, Chou W, Poole FL, Westpheling J, Hettich R,  
498 Giannone R, Lewis DL, Kelly R, Gilbert HJ, Henrissat B, Xu Y, Adams MWW (2011)  
499 Insights into plant biomass conversion from the genome of the anaerobic thermophilic  
500 bacterium *Caldicellulosiruptor bescii* DSM 6725. Nucleic Acids Res 39:3240 -3254.  
501 doi:10.1093/nar/gkq1281
- 502 24. Elkins JG, Lochner A, Hamilton-Brehm SD, Davenport KW, Podar M, Brown SD, Land ML,  
503 Hauser LJ, Klingeman DM, Raman B, Goodwin LA, Tapia R, Meincke LJ, Detter JC,  
504 Bruce DC, Han CS, Palumbo AV, Cottingham RW, Keller M, Graham DE (2010)  
505 Complete genome sequence of the cellulolytic thermophile *Caldicellulosiruptor*  
506 *obsidiansis* OB47T. J Bacteriol 192:6099-6100. doi:10.1128/JB.00950-10
- 507 25. Farkas J, Chung D, Cha M, Copeland J, Grayeski P, Westpheling J (2013) Improved growth  
508 media and culture techniques for genetic analysis and assessment of biomass utilization  
509 by *Caldicellulosiruptor bescii*. J Ind Microbiol Biotechnol 40:1-9. doi:10.1007/s10295-  
510 012-1202-1
- 511 26. Gibbs MD, Saul DJ, Lüthi E, Bergquist PL (1992) The beta-mannanase from "*Caldocellum*  
512 *saccharolyticum*" is part of a multidomain enzyme. Appl Environ Microbiol 58:3864–3867
- 513 27. Goris J, Konstantinidis KT, Klappenbach JA, Coenye T, Vandamme P, Tiedje JM (2007)  
514 DNA-DNA hybridization values and their relationship to whole-genome sequence  
515 similarities. Int J Syst Evol Microbiol 57:81-91. doi:10.1099/ijs.0.64483-0
- 516 28. Hobbie JE, Daley RJ, Jasper S (1977) Use of nuclepore filters for counting bacteria by  
517 fluorescence microscopy. Appl Environ Microbiol 33:1225-1228

- 518 29. Kahn A, Moraïs S, Galanopoulou AP, Chung D, Sarai NS, Hengge N, Hatzinikolaou DG,  
519 Himmel ME, Bomble YJ, Bayer EA (2019) Creation of a functional hyperthermostable  
520 designer cellulosome. *Biotechnol Biofuel* 12:44. doi:10.1186/s13068-019-1386-y
- 521 30. Kim S-K, Chung D, Himmel ME, Bomble YJ, Westpheling J (2016) Heterologous expression  
522 of family 10 xylanases from *Acidothermus cellulolyticus* enhances the exoproteome of  
523 *Caldicellulosiruptor bescii* and growth on xylan substrates. *Biotechnol Biofuel* 9.  
524 doi:10.1186/s13068-016-0588-9
- 525 31. Kim S-K, Chung D, Himmel ME, Bomble YJ, Westpheling J (2017) Heterologous expression  
526 of a  $\beta$ -d-glucosidase in *Caldicellulosiruptor bescii* has a surprisingly modest effect on the  
527 activity of the exoproteome and growth on crystalline cellulose. *J Ind Microbiol*  
528 *Biotechnol* 44:1643-1651. doi:10.1007/s10295-017-1982-4
- 529 32. Kim S-K, Chung D, Himmel ME, Bomble YJ, Westpheling J (2017) In vivo synergistic activity  
530 of a CAZyme cassette from *Acidothermus cellulolyticus* significantly improves the  
531 cellulolytic activity of the *C. bescii* exoproteome. *Biotechnol Bioeng* 114:2474-2480.  
532 doi:10.1002/bit.26366
- 533 33. Kim S-K, Chung D, Himmel ME, Bomble YJ, Westpheling J (2019) Heterologous co-  
534 expression of two  $\beta$ -glucanases and a cellobiose phosphorylase resulted in a significant  
535 increase in the cellulolytic activity of the *Caldicellulosiruptor bescii* exoproteome. *J Ind*  
536 *Microbiol Biotechnol*. doi:10.1007/s10295-019-02150-0
- 537 34. Kim S-K, Himmel ME, Bomble YJ, Westpheling J (2018) Expression of a cellobiose  
538 phosphorylase from *Thermotoga maritima* in *Caldicellulosiruptor bescii* improves the  
539 phosphorolytic pathway and results in a dramatic increase in cellulolytic activity. *Appl*  
540 *Environ Microbiol* 84:e02348-02317. doi:10.1128/AEM.02348-17
- 541 35. Kristensen DM, Kannan L, Coleman MK, Wolf YI, Sorokin A, Koonin EV, Mushegian A  
542 (2010) A low-polynomial algorithm for assembling clusters of orthologous groups from

- 543 intergenomic symmetric best matches. *Bioinformatics* 26:1481-1487.  
544 doi:10.1093/bioinformatics/btq229
- 545 36. Lee LL, Blumer-Schuette SE, Izquierdo JA, Zurawski JV, Loder AJ, Conway JM, Elkins JG,  
546 Podar M, Clum A, Jones PC, Piatek MJ, Weighill DA, Jacobson DA, Adams MWW, Kelly  
547 RM (2018) Genus-wide assessment of lignocellulose utilization in the extremely  
548 thermophilic genus *Caldicellulosiruptor* by genomic, pangenomic, and metagenomic  
549 analyses. *Appl Environ Microbiol* 84. doi:10.1128/AEM.02694-17
- 550 37. Lee LL, Hart WS, Lunin VV, Alahuhta M, Bomble YJ, Himmel ME, Blumer-Schuette SE,  
551 Adams MWW, Kelly RM (2019) Comparative biochemical and structural analysis of  
552 novel cellulose binding proteins (tāpirins) from extremely thermophilic  
553 *Caldicellulosiruptor* species. *Appl Environ Microbiol* 85:e01983-01918.  
554 doi:10.1128/AEM.01983-18
- 555 38. Lee LL, Izquierdo JA, Blumer-Schuette SE, Zurawski JV, Conway JM, Cottingham RW,  
556 Huntemann M, Copeland A, Chen IM, Kyrpides N, Markowitz V, Palaniappan K, Ivanova  
557 N, Mikhailova N, Ovchinnikova G, Andersen E, Pati A, Stamatis D, Reddy TB, Shapiro  
558 N, Nordberg HP, Cantor MN, Hua SX, Woyke T, Kelly RM (2015) Complete genome  
559 sequences of *Caldicellulosiruptor* sp. strain Rt8.B8, *Caldicellulosiruptor* sp. strain  
560 Wai35.B1, and "*Thermoanaerobacter cellulolyticus*". *Genome Announc* 3.  
561 doi:10.1128/genomeA.00440-15
- 562 39. Li L, Stoeckert CJ, Jr., Roos DS (2003) OrthoMCL: identification of ortholog groups for  
563 eukaryotic genomes. *Genome Res* 13:2178-2189. doi:10.1101/gr.1224503
- 564 40. Mendoza C, Blumer-Schuette SE (2019) Complete genome sequence of *Caldicellulosiruptor*  
565 *changbaiensis* CBS-Z, an extremely thermophilic, cellulolytic bacterium isolated from a  
566 hot spring in China. *Microbiol Resour Announc* 8. doi:10.1128/MRA.00021-19
- 567 41. Mukherjee S, Seshadri R, Varghese NJ, Eloë-Fadrosh EA, Meier-Kolthoff JP, Goker M,  
568 Coates RC, Hadjithomas M, Pavlopoulos GA, Paez-Espino D, Yoshikuni Y, Visel A,

- 569 Whitman WB, Garrity GM, Eisen JA, Hugenholtz P, Pati A, Ivanova NN, Woyke T, Klenk  
570 HP, Kyrpides NC (2017) 1,003 reference genomes of bacterial and archaeal isolates  
571 expand coverage of the tree of life. *Nat Biotechnol* 35:676-+. doi:10.1038/nbt.3886
- 572 42. Ng TK, Ben-Bassat A, Zeikus JG (1981) Ethanol production by thermophilic bacteria:  
573 Fermentation of cellulosic substrates by cocultures of *Clostridium thermocellum* and  
574 *Clostridium thermohydrosulfuricum*. *Appl Environ Microbiol* 41:1337-1343
- 575 43. Ng TK, Zeikus JG (1981) Comparison of extracellular cellulase activities of *Clostridium*  
576 *thermocellum* LQRI and *Trichoderma reesei* QM9414. *Appl Environ Microbiol* 42:231-  
577 240
- 578 44. Numan MT, Bhosle NB (2006) Alpha-L-arabinofuranosidases: the potential applications in  
579 biotechnology. *J Ind Microbiol Biotechnol* 33:247-260. doi:10.1007/s10295-005-0072-1
- 580 45. Park JI, Kent MS, Datta S, Holmes BM, Huang Z, Simmons BA, Sale KL, Sapra R (2011)  
581 Enzymatic hydrolysis of cellulose by the cellobiohydrolase domain of CelB from the  
582 hyperthermophilic bacterium *Caldicellulosiruptor saccharolyticus*. *Bioresour Technol*  
583 102:5988-5994. doi:10.1016/j.biortech.2011.02.036
- 584 46. Park JI, Steen EJ, Burd H, Evans SS, Redding-Johnson AM, Batth T, Benke PI,  
585 D'Haeseleer P, Sun N, Sale KL, Keasling JD, Lee TS, Petzold CJ, Mukhopadhyay A,  
586 Singer SW, Simmons BA, Gladden JM (2012) A thermophilic ionic liquid-tolerant  
587 cellulase cocktail for the production of cellulosic biofuels. *PLoS One* 7:e37010.  
588 doi:10.1371/journal.pone.0037010
- 589 47. R Core T (2015) R: A language and environment for statistical computing. R Foundation for  
590 Statistical Computing. Vienna, Austria
- 591 48. Reynolds PH, Sissons CH, Daniel RM, Morgan HW (1986) Comparison of cellulolytic  
592 activities in *Clostridium thermocellum* and three thermophilic, cellulolytic anaerobes. *Appl*  
593 *Environ Microbiol* 51:12-17

- 594 49. Richter M, Rossello-Mora R (2009) Shifting the genomic gold standard for the prokaryotic  
595 species definition. Proc Natl Acad Sci U S A 106:19126-19131.  
596 doi:10.1073/pnas.0906412106
- 597 50. Sander K, Chung D, Hyatt D, Westpheling J, Klingeman DM, Rodriguez M, Engle NL,  
598 Tschaplinski TJ, Davison BH, Brown SD Rex in *Caldicellulosiruptor bescii*: Novel regulon  
599 members and its effect on the production of ethanol and overflow metabolites.  
600 MicrobiologyOpen 0:e00639. doi:10.1002/mbo3.639
- 601 51. Saul DJ, Williams LC, Grayling RA, Chamley LW, Love DR, Bergquist PL (1990) celB, a  
602 gene coding for a bifunctional cellulase from the extreme thermophile "*Caldocellum*  
603 *saccharolyticum*". Appl Environ Microbiol 56:3117-3124
- 604 52. Smith SP, Bayer EA, Czjzek M (2017) Continually emerging mechanistic complexity of the  
605 multi-enzyme cellulosome complex. Curr Opin Struct Biol 44:151-160.  
606 doi:10.1016/j.sbi.2017.03.009
- 607 53. Su X, Mackie RI, Cann IKO (2012) Biochemical and mutational analyses of a multidomain  
608 cellulase/mannanase from *Caldicellulosiruptor bescii*. Appl Environ Microbiol 78:2230.  
609 doi:10.1128/AEM.06814-11
- 610 54. Svetlichnyi VA, T. P. Svetlichnaya, N. A. Chernykh, and G. A. Zavarzin (1990) *Anaerocellum*  
611 *thermophilum* gen. nov sp. nov. an extremely thermophilic cellulolytic eubacterium  
612 isolated from hot-springs in the Valley of Geysers. Microbiology 59:598-604
- 613 55. Tatusova T, DiCuccio M, Badretdin A, Chetvernin V, Nawrocki EP, Zaslavsky L, Lomsadze  
614 A, Pruitt KD, Borodovsky M, Ostell J (2016) NCBI prokaryotic genome annotation  
615 pipeline. Nucleic Acids Res 44:6614-6624. doi:10.1093/nar/gkw569
- 616 56. Taya M, Hinoki H, Kobayashi T (1985) Tungsten requirement of an extremely thermophilic,  
617 cellulolytic anaerobe (strain NA10). Agric Biol Chem 49:2513-2515.  
618 doi:<http://dx.doi.org/10.1080/00021369.1985.10867120>

- 619 57. Te'o VS, Saul DJ, Bergquist PL (1995) celA, another gene coding for a multidomain  
620 cellulase from the extreme thermophile *Caldocellum saccharolyticum*. Appl Microbiol  
621 Biotechnol 43:291-296
- 622 58. Tettelin H, Massignani V, Cieslewicz MJ, Donati C, Medini D, Ward NL, Angiuoli SV, Crabtree  
623 J, Jones AL, Durkin AS, Deboy RT, Davidsen TM, Mora M, Scarselli M, Margarit y Ros I,  
624 Peterson JD, Hauser CR, Sundaram JP, Nelson WC, Madupu R, Brinkac LM, Dodson  
625 RJ, Rosovitz MJ, Sullivan SA, Daugherty SC, Haft DH, Selengut J, Gwinn ML, Zhou L,  
626 Zafar N, Khouri H, Radune D, Dimitrov G, Watkins K, O'Connor KJ, Smith S, Utterback  
627 TR, White O, Rubens CE, Grandi G, Madoff LC, Kasper DL, Telford JL, Wessels MR,  
628 Rappuoli R, Fraser CM (2005) Genome analysis of multiple pathogenic isolates of  
629 *Streptococcus agalactiae*: implications for the microbial "pan-genome". Proc Natl Acad  
630 Sci U S A 102:13950-13955. doi:10.1073/pnas.0506758102
- 631 59. van de Werken HJG, Verhaart MRA, VanFossen AL, Willquist K, Lewis DL, Nichols JD,  
632 Goorissen HP, Mongodin EF, Nelson KE, van Niel EWJ, Stams AJM, Ward DE, de Vos  
633 WM, van der Oost J, Kelly RM, Kengen SWM (2008) Hydrogenomics of the extremely  
634 thermophilic bacterium *Caldicellulosiruptor saccharolyticus*. Appl Environ Microbiol  
635 74:6720-6729. doi:10.1128/Aem.00968-08
- 636 60. Wang Z-W, Hamilton-Brehm SD, Lochner A, Elkins JG, Morrell-Falvey JL (2011)  
637 Mathematical modeling of hydrolysate diffusion and utilization in cellulolytic biofilms of  
638 the extreme thermophile *Caldicellulosiruptor obsidiansis*. Bioresour Technol 102:3155-  
639 3162. doi:10.1016/j.biortech.2010.10.104
- 640 61. Wick RR, Judd LM, Gorrie CL, Holt KE (2017) Unicycler: Resolving bacterial genome  
641 assemblies from short and long sequencing reads. PLoS Comput Biol 13:e1005595.  
642 doi:10.1371/journal.pcbi.1005595
- 643 62. Yang SJ, Kataeva I, Hamilton-Brehm SD, Engle NL, Tschaplinski TJ, Doeppke C, Davis M,  
644 Westpheling J, Adams MWW (2009) Efficient degradation of lignocellulosic plant



- 645 biomass, without pretreatment, by the thermophilic anaerobe "*Anaerocellum*  
646 *thermophilum*" DSM 6725. Applied and Environmental Microbiology 75:4762-4769.  
647 doi:10.1128/Aem.00236-09
- 648 63. Ying Y, Meng D, Chen X, Li F (2013) An extremely thermophilic anaerobic bacterium  
649 *Caldicellulosiruptor* sp. F32 exhibits distinctive properties in growth and xylanases during  
650 xylan hydrolysis. Enzyme Microb Technol 53:194-199.  
651 doi:10.1016/j.enzmictec.2013.04.004
- 652 64. Yokoyama H, Yamashita T, Morioka R, Ohmori H (2014) Extracellular secretion of  
653 noncatalytic plant cell wall-binding proteins by the cellulolytic thermophile  
654 *Caldicellulosiruptor bescii*. J Bacteriol 196:3784-3792. doi:10.1128/JB.01897-14
- 655 65. Young J, Chung D, Bomble YJ, Himmel ME, Westpheling J (2014) Deletion of  
656 *Caldicellulosiruptor bescii* CelA reveals its crucial role in the deconstruction of  
657 lignocellulosic biomass. Biotechnol Biofuel 7:142. doi:10.1186/s13068-014-0142-6
- 658 66. Zurawski JV, Conway JM, Lee LL, Simpson HJ, Izquierdo JA, Blumer-Schuette S, Nookaew  
659 I, Adams MW, Kelly RM (2015) Comparative analysis of extremely thermophilic  
660 *Caldicellulosiruptor* species reveals common and unique cellular strategies for plant  
661 biomass utilization. Appl Environ Microbiol 81:7159-7170. doi:10.1128/AEM.01622-15
- 662 67. Zverlov V, Mahr S, Riedel K, Bronnenmeier K (1998) Properties and gene structure of a  
663 bifunctional cellulolytic enzyme (CelA) from the extreme thermophile '*Anaerocellum*  
664 *thermophilum*' with separate glycosyl hydrolase family 9 and 48 catalytic domains.  
665 Microbiology 144:457-465. doi:10.1099/00221287-144-2-457  
666



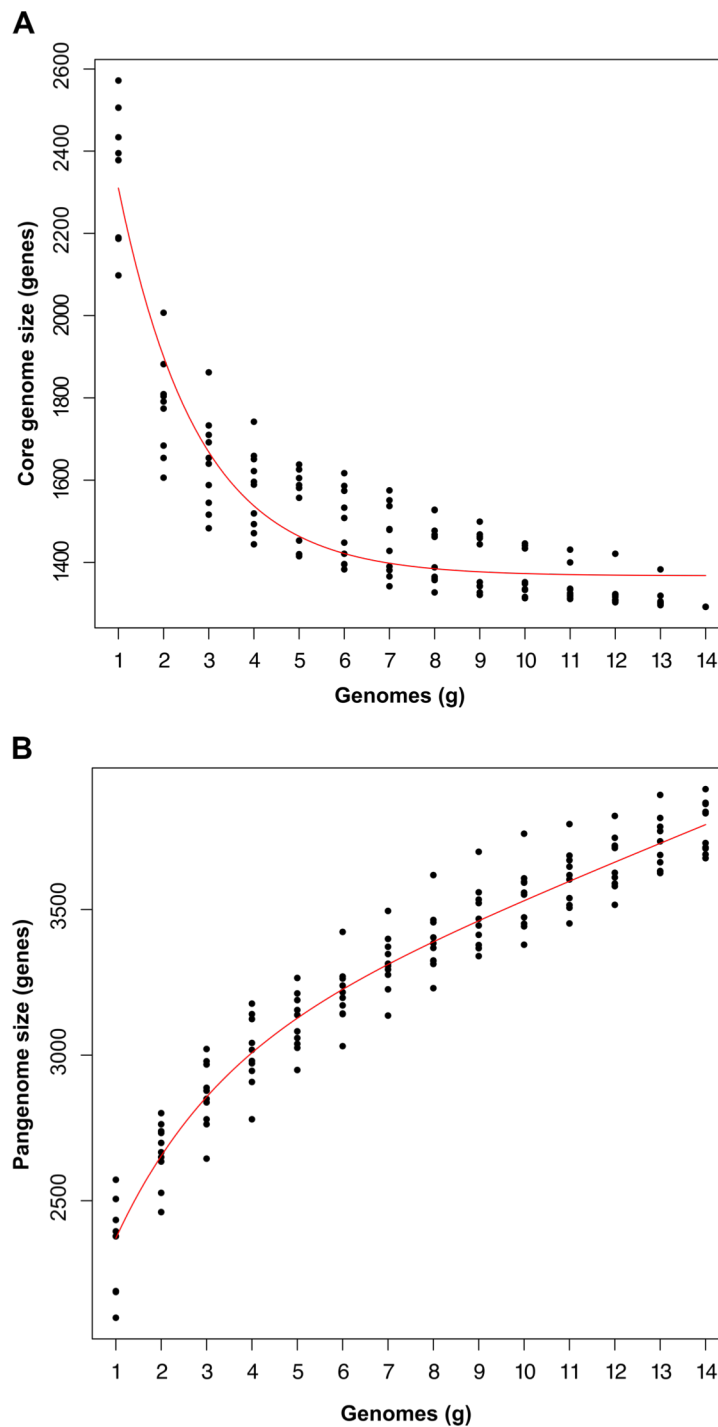

**Figure 1. Core- and pangenome size estimates calculated from random sampling of 14 *Caldicellulosiruptor* genomes. (A) Fitted curve of the estimated *Caldicellulosiruptor* core genome from 10 random samples of genomes up to  $n=14$ . The current size of the core genome is 1367 orthologous clusters. (B) Fitted curve of the estimated *Caldicellulosiruptor* pangenome from 10 random samples of genomes up to  $n=14$ . The *Caldicellulosiruptor* pangenome remains open and has increased to 3791 genes. The rate of growth for the pangenome is 63.2 new genes per genome sequenced. Core- and pangenome estimates were calculated from the equations reported by Tettelin *et al.*, [58] using GET\_HOMOLOGUES software [19].**

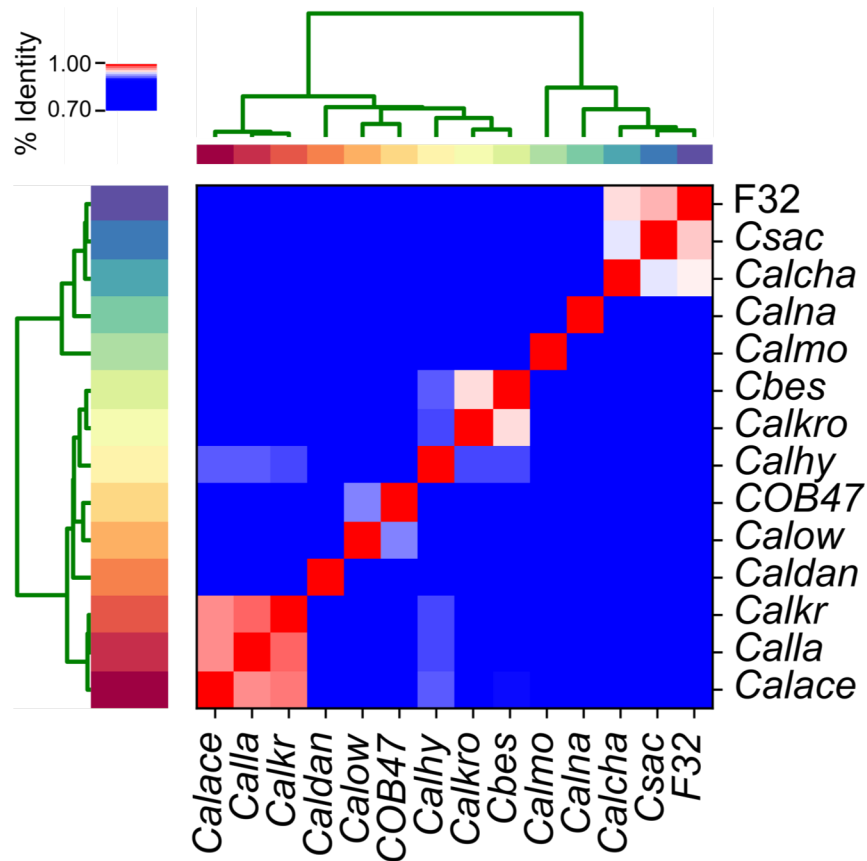

**Figure 2. Heatmap representation of the average nucleotide identity for 14 genome sequenced species from the genus *Caldicellulosiruptor*.** Average nucleotide identity (ANIb) was calculated on the basis of legacy BLASTn sequence identity over 1020nt sequence fragments. ANIb values of all 14 genomes are represented by a heat plot ranging from blue (75% < ANIb < 90%), white (90% < ANIb < 95%) to red (ANIb > 95%). Pyani (<https://github.com/widdowquinn/pyani>) was used to calculate ANIb values and generate the clustered heatmap. Hierarchical cluster dendrograms were generated on the basis of similar ANIb values across each species. ANIb values are reported in **Table S1**. Calace, *C. acetigenus*; Cbes, *C. bescii*; Calcha, *C. changbaiensis*; Caldan, *C. danielii*; Calhy, *C. hydrothermalis*; Calkr, *C. kristjanssonii*; Calkro, *C. kronotskyensis*; Calla, *C. lactoaceticus*; Calmo, *C. morgani*; Calna, *C. naganoensis*; COB47, *C. obsidiansis*; Calow, *C. owensensis*; Csac, *C. saccharolyticus*; F32, *C. sp.* F32.

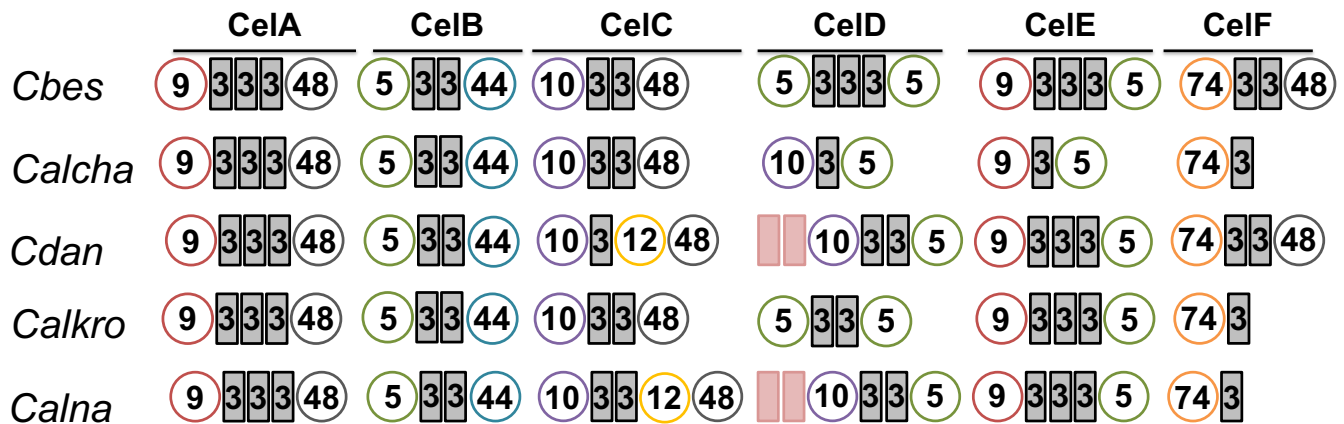

**Figure 3. Modular multifunctional enzymes encoded for by the glucan degradation locus.** Glucan degradation loci were selected on the basis of the presence of “ACE” cellulases. ACE cellulases: CelA, CelC and CelE. Circles represent the glycoside hydrolase (GH) domains, rectangles represent the carbohydrate binding module (CBM) domains. GH5, green circles; GH9, red circles; GH10, violet circles; GH 44, blue circles; GH48, grey circles; GH74, orange circles. CBM3, grey rectangles; CBM22, pink rectangles.

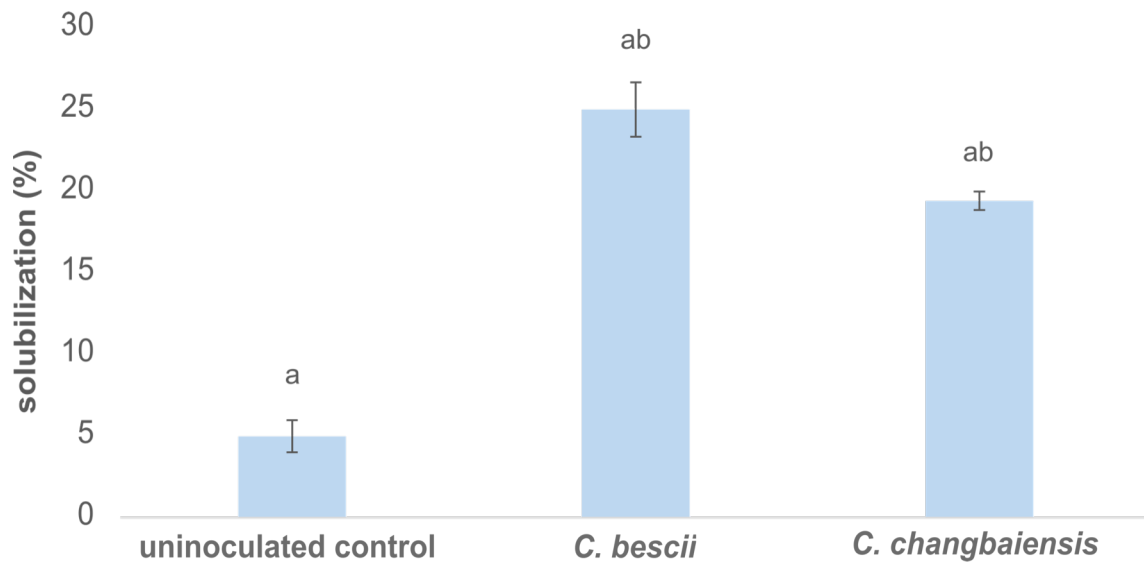

**Figure 4. Solubilization of microcrystalline cellulose by *C. bescii* and *C. changbaiensis*.** Uninoculated control, indicates abiotic cellulose solubilization in LOD medium. Error bars represent standard error (n=3). Similar letters over columns denote  $p < 0.05$  as determined by a t-test.

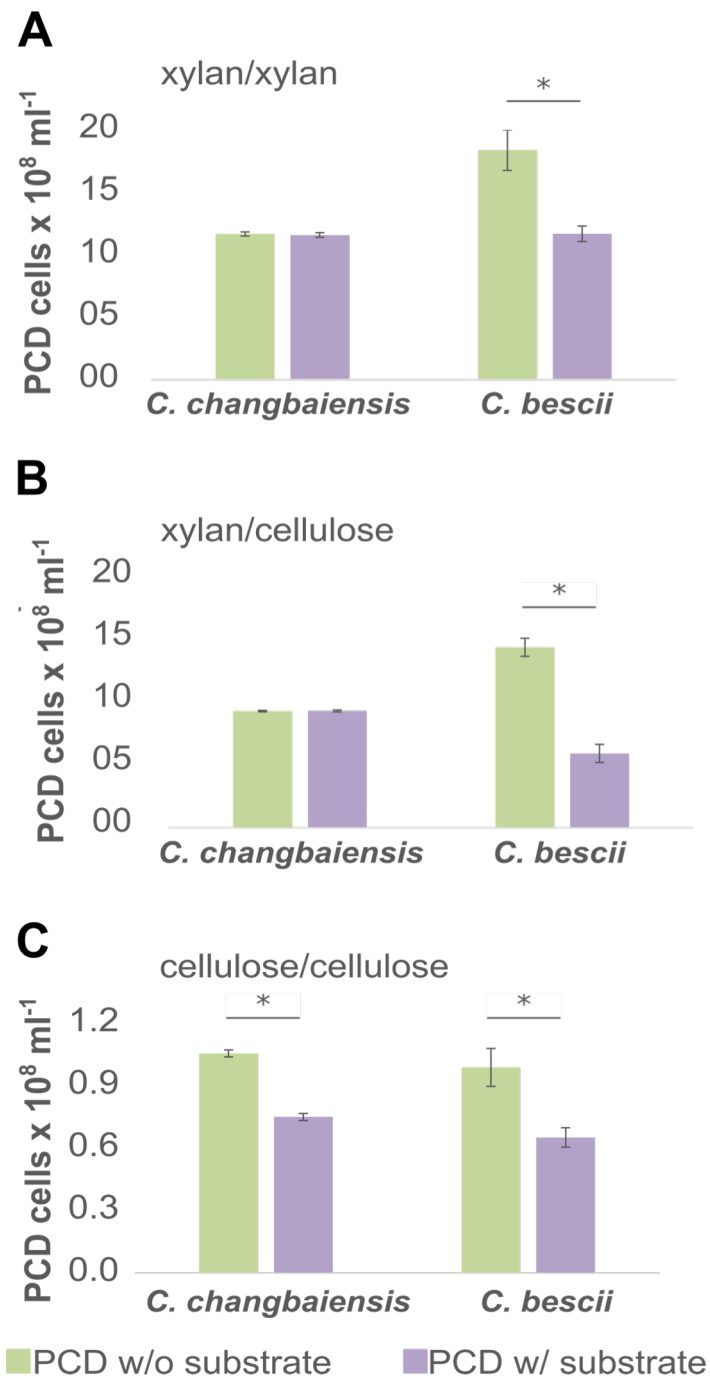

**Figure 5. Comparison of the ability of *C. bescii* or *C. changbaiensis* planktonic cells to attach to polysaccharides.** Titles above bar charts indicate the carbon source for growth/ binding substrate. **(A, B)** When cells are grown on xylan, only planktonic *C. bescii* cells were able to attach to xylan or cellulose. **(C)** Cells grown on cellulose as the carbon source and exposed to cellulose as the binding substrate. Planktonic cell densities (PCD), enumerated by epifluorescence microscopy are plotted on the y-axis. Green columns indicate PCD without binding substrate and purple columns indicate PCD with the binding substrate. \* indicates  $p < 0.01$ . All assays had  $n=6$  biological replicates.

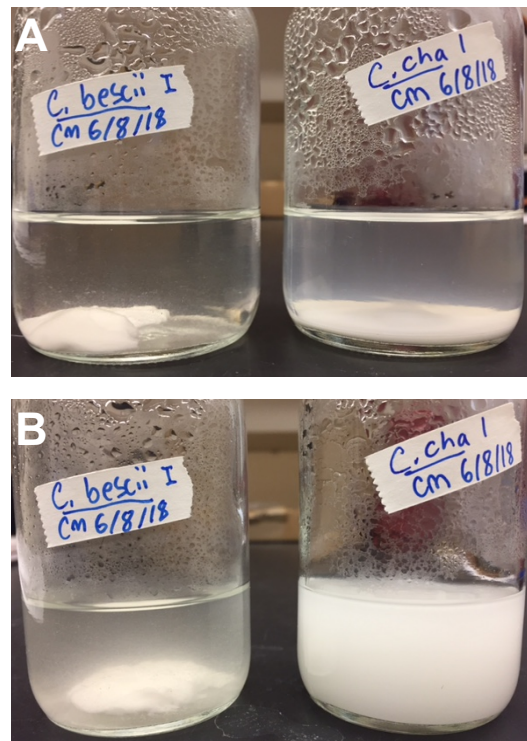

**Figure 6. Flocculation of *C. bescii* cells cultured on chemically defined medium and microcrystalline cellulose. (A)** Formation of a floc of *C. bescii* cells around microcrystalline cellulose (diameter, 20 $\mu$ m) while planktonic *C. changbaiensis* cells (cloudiness) are visible. **(B)** Same serum bottles as in “A”, however the bottles were vigorously mixed. The *C. bescii* floc remains fairly stable, while both microcrystalline cellulose and cells are mixed in the *C. changbaiensis* culture.

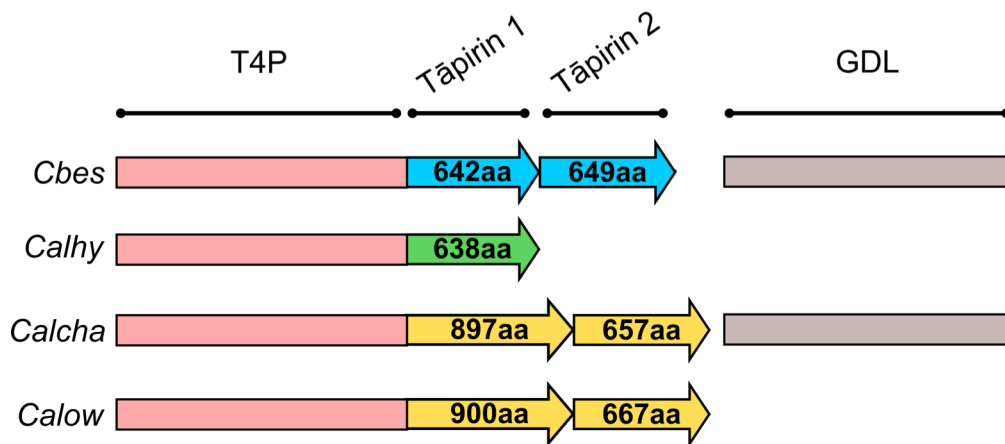

**Figure 7. Genomic context for the location of the tāpirins from strongly to weakly cellulolytic *Caldicellulosiruptor* species.** Different colors represent the classical versus atypical tāpirins. Blue arrows: *Cbes* tāpirin 1 (Gen bank accession: YP\_002573732) and *Cbes* tāpirin 2 (Gen bank accession: YP\_002573731). Green arrow: *Calhy* tāpirin 1 (Gen bank accession number: YP\_003992006). Yellow arrows: *Calcha* tāpirin 1 (Gen bank accession: WP\_127352232.1) and 2 (Gen bank accession: WP\_127352233.1), and *Calow* tāpirin 1 (Gen bank accession: YP\_004002936) and 2 (Gen bank accession r: YP\_004002935). Grey rectangles indicate the presence of the GDL downstream of the tāpirins. Atypical tāpirin 1 is annotated as a hypothetical protein and atypical tāpirin 2 is annotated as a von Willebrand factor A protein. *Cbes*, *C. bescii*; *Calhy*, *C. hydrothermalis*; *Calcha*, *C. changbaiensis* and *Calow*, *C. owensensis*. Peach rectangles represent the type IV pilus locus directly upstream of the tāpirins. Arrows indicate tāpirin 1 and 2. Numbers in the tāpirin arrows indicate the amino acid length.
